# Supplementary material for: The Repertoire and Dynamics of Evolutionary Adaptations to Controlled Nutrient-Limited Environments in Yeast
Source: PubMed Central journal article supplement (PMC2586090; doi:10.1371/journal.pgen.1000303), 2008-12-12

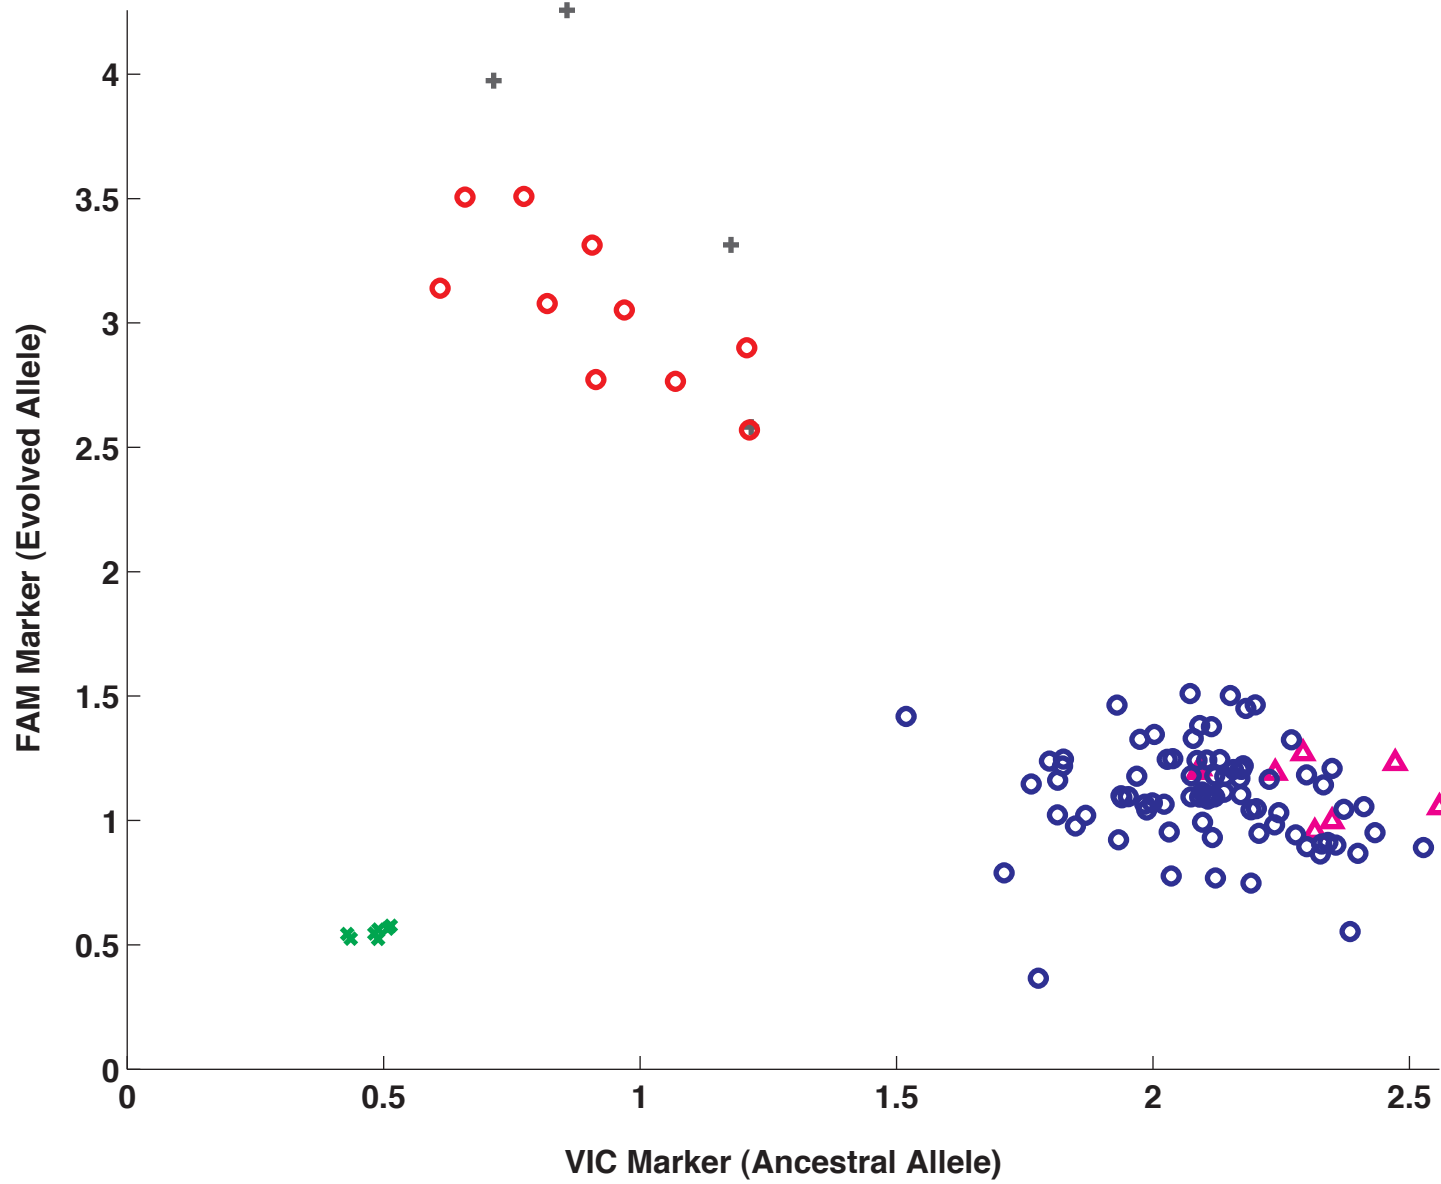

Supplement: pgen.1000303.s005.pdf [file pgen.1000303.s005.pdf]
